# Supplementary material for: Telephone lifestyle intervention to prevent diabetes in women with recent gestational diabetes mellitus attending the national health system: the LINDA-Brasil clinical trial
Source: PubMed Central journal article supplement — BMJ Open. 2024 Oct 15;14(10):e082572. doi: 10.1136/bmjopen-2023-082572 (PMC11481157; doi:10.1136/bmjopen-2023-082572), 2024-10-15
Supplement: bmjopen-14-10-s001.pdf [file bmjopen-14-10-s001.pdf]

# Supplemental Materials

## Index

|                            |   |
|----------------------------|---|
| Supplemental Table 1 ..... | 2 |
| Supplemental Table 2 ..... | 3 |
| Supplemental Table 3 ..... | 4 |

Supplementary Table 1. Components of the intervention

| Component      | Description                                                                                                                                                                                                                                                                                                                                                                                                                    |
|----------------|--------------------------------------------------------------------------------------------------------------------------------------------------------------------------------------------------------------------------------------------------------------------------------------------------------------------------------------------------------------------------------------------------------------------------------|
| Breastfeeding  | <ul style="list-style-type: none"> <li>• Breastfeed exclusively for up to six months of life</li> <li>• Maintain partial breastfeeding thereafter for at least three additional months</li> </ul>                                                                                                                                                                                                                              |
| Weight control | <ul style="list-style-type: none"> <li>• Avoid weight gain in order to return to pre-pregnancy weight</li> <li>• Those with excess weight gradually lose up to 5% of their body weight</li> <li>• If this goal had been achieved at baseline, attempt a further 5% loss of current weight or achieve a BMI of 22.5 kg/m<sup>2</sup></li> </ul>                                                                                 |
| Healthy eating | <ul style="list-style-type: none"> <li>• Avoid ultraprocessed and other high energy dense foods</li> <li>• Increase food choices from a variety of less processed and nutritious foods</li> </ul>                                                                                                                                                                                                                              |
| Being active   | <ul style="list-style-type: none"> <li>• Decrease sedentary periods during the day</li> <li>• Increase physical activity gradually with a goal of at least 150 minutes of moderate or 75 minutes of vigorous physical activity per week</li> <li>• Include physical activity in leisure time, if possible, with the baby</li> <li>• Include stretching and strength training and further efforts to improve fitness</li> </ul> |

Supplementary Table 2. The core curriculum of telephone intervention.

| Part     | Session                                            | Focus                                                                                                |
|----------|----------------------------------------------------|------------------------------------------------------------------------------------------------------|
| <b>1</b> | <b>Planning healthy habits</b>                     |                                                                                                      |
|          | 1                                                  | Eating well, healthy diet                                                                            |
|          | 2                                                  | Reducing ultra-processed foods and other high-calory foods                                           |
|          | 3                                                  | Increasing nutritious and less caloric foods observing the whole variety of the less processed foods |
|          | 4                                                  | Purchasing planning, organization, new recipes, progress, and difficulties                           |
|          | 5                                                  | How to be more physically active                                                                     |
|          | 6                                                  | Physical activity plans                                                                              |
|          | 7                                                  | Energy balance: food and physical activity                                                           |
| <b>2</b> | <b>Detecting and solving problems</b>              |                                                                                                      |
|          | 8                                                  | Controlling stimuli that lead to overeating                                                          |
|          | 9                                                  | Planning how to solve problems encountered in the food or physical activity plan                     |
|          | 10                                                 | Making social stimuli positive for healthy plans                                                     |
|          | 11                                                 | Reflecting on negative thoughts against healthy plans                                                |
|          | 12                                                 | Managing stress                                                                                      |
|          | 13                                                 | The slippery path of lifestyle changes                                                               |
|          | 14                                                 | Increasing physical activity                                                                         |
| <b>3</b> | <b>Reviewing and or maintaining healthy habits</b> |                                                                                                      |
|          | 15                                                 | Review: How to adjust energy balance to lose weight                                                  |
|          | 16                                                 | Review: How to adjust energy balance to maintain weight                                              |
|          | 17                                                 | Dietary changes: What else can be improved?                                                          |
|          | 18                                                 | How to train to increase fitness                                                                     |
|          | 19                                                 | How to deal with everyday difficulties in adopting a healthy lifestyle                               |
|          | 20                                                 | How to keep on the path of change                                                                    |

Supplementary Table 3. Post hoc subgroup analysis of treatment effect on the incidence of diabetes. (N=466)

|                            | Group        | Incidence/100 PY<br>(95% CI) | Hazard ratio<br>(95% CI) |
|----------------------------|--------------|------------------------------|--------------------------|
| Overall                    | Control      | 13.2 (10.3-16.2)             | 0.84 (0.60-1.19)         |
|                            | Intervention | 11.5 (8.8-14.1)              |                          |
| Entry                      |              |                              |                          |
| Before March 2019          | Control      | 14.9 (11.4-18.5)             | 0.71 (0.48-1.04)         |
|                            | Intervention | 10.9 (8.0-13.9)              |                          |
| After March 2019           | Control      | 8.1 (2.9-13.2)               | 1.60 (0.72-3.56)         |
|                            | Intervention | 13.0 (7.2-18.8)              |                          |
| < 6 months after birth     | Control      | 15.6 (10.6-20.6)             | 0.61 (0.37-1.00)         |
|                            | Intervention | 9.9 (6.4-13.4)               |                          |
| ≥ 6 months after birth     | Control      | 11.5 (8.0-15.0)              | 1.10 (0.69-1.76)         |
|                            | Intervention | 13.2 (9.1-17.3)              |                          |
| Age (years)                |              |                              |                          |
| < 35                       | Control      | 13.3 (9.2-17.4)              | 0.86 (0.53-1.40)         |
|                            | Intervention | 11.5 (7.6-15.4)              |                          |
| ≥35                        | Control      | 12.9 (8.7-17.1)              | 0.85 (0.52-1.38)         |
|                            | Intervention | 11.7 (8.0-15.5)              |                          |
| BMI before pregnancy       |              |                              |                          |
| ≥ 30 kg/m <sup>2</sup>     | Control      | 18.0 (12.5-23.5)             | 0.76 (0.48-1.20)         |
|                            | Intervention | 14.6 (10.2-18.9)             |                          |
| < 30 kg/m <sup>2</sup>     | Control      | 10.7 (7.3-14.1)              | 0.79 (0.47-1.32)         |
|                            | Intervention | 8.6 (5.4-11.9)               |                          |
| Number of living children  |              |                              |                          |
| 1                          | Control      | 9.7 (5.0-14.4)               | 1.07 (0.53-2.14)         |
|                            | Intervention | 10.8 (6.1-15.5)              |                          |
| 2                          | Control      | 13.6 (8.8-18.4)              | 0.73 (0.41-1.30)         |
|                            | Intervention | 10.5 (6.3-14.8)              |                          |
| 3                          | Control      | 16.1 (10.6-21.5)             | 0.79 (0.46-1.38)         |
|                            | Intervention | 13.0 (8.0-19.1)              |                          |
| Insulin during pregnancy   |              |                              |                          |
| Yes                        | Control      | 14.0 (9.9-18.0)              | 0.74 (0.46-1.20)         |
|                            | Intervention | 10.8 (7.2-14.5)              |                          |
| No                         | Control      | 12.3 (8.1-16.5)              | 0.98 (0.59-1.61)         |
|                            | Intervention | 12.0 (8.1-16.0)              |                          |
| Family History of Diabetes |              |                              |                          |
| Yes                        | Control      | 13.4 (10.1-16.6)             | 0.86 (0.59-1.61)         |
|                            | Intervention | 11.8 (8.7-14.8)              |                          |
| No                         | Control      | 12.3 (5.5-19.0)              | 0.86 (0.38-1.94)         |
|                            | Intervention | 10.9 (5.2-16.5)              |                          |
| Prediabetes at baseline    |              |                              |                          |
| Yes                        | Control      | 17.0 (12.9-21.1)             | 0.88 (0.61-1.29)         |
|                            | Intervention | 15.5 (11.6-19.3)             |                          |
| No                         | Control      | 6.4 (2.9-9.9)                | 0.66 (0.27-1.62)         |
|                            | Intervention | 4.3 (1.4-7.2)                |                          |

CI: Confidence interval; PY: person-years.
